# Supplementary material for: Synthesis of hyaluronic acid or O-carboxymethyl chitosan-stabilized ZnO–ginsenoside Rh2 nanocomposites incorporated with aqueous leaf extract of Dendropanax morbifera Léveille: in vitro studies as potential sunscreen agents
Source: Royal Society of Chemistry journal article supplement (doi:10.1039/c8nj06044d), 2019-01-01
Supplement: c8nj06044d1.pdf [file c8nj06044d1.pdf]

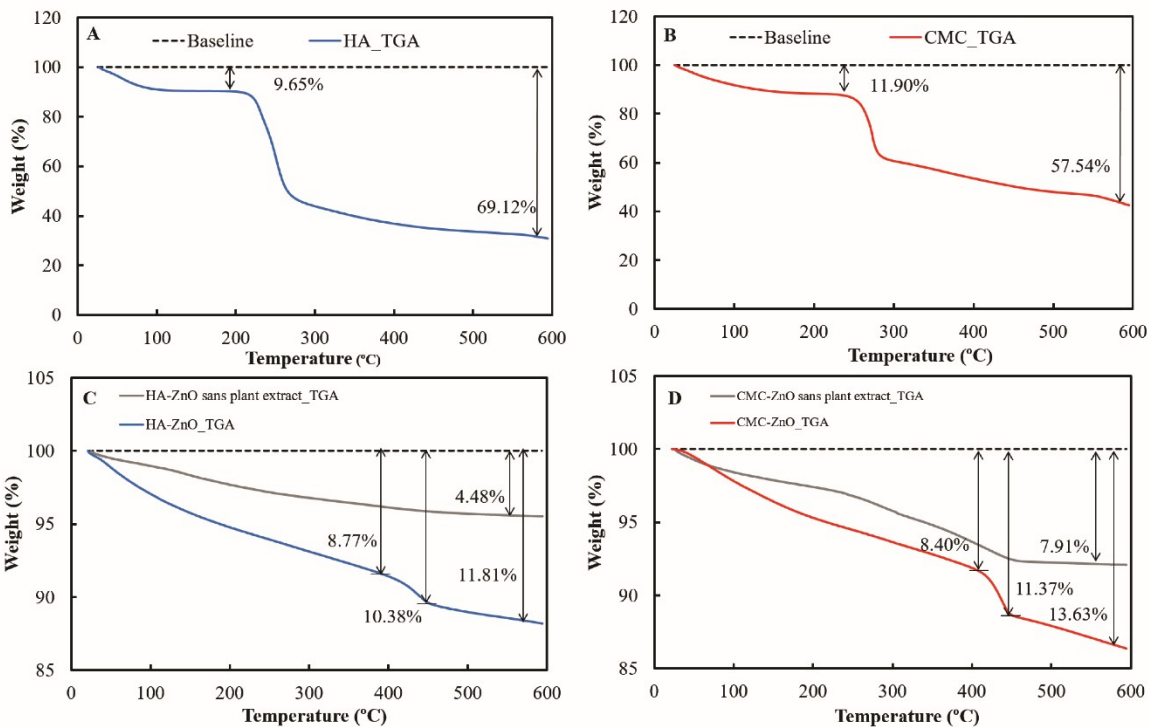

**Fig. S1** TGA spectra of polymer and polymer-functionalized nanocomposites. HA (A), CMC (B), HA-ZnONcs (C) and CMC-ZnONcs (D).

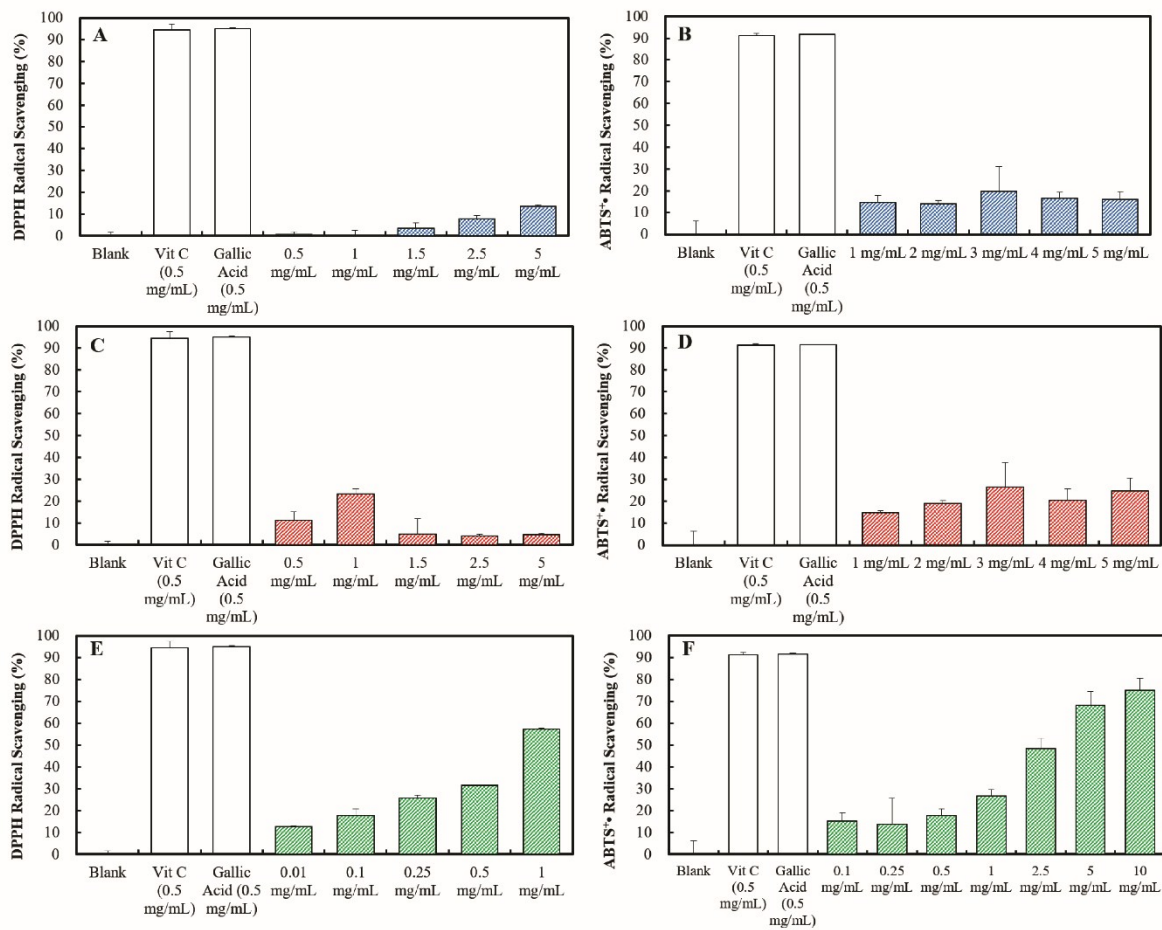

**Fig. S2** In vitro antioxidant activity of HA (blue), CMC (red), and *D. morbifera* leaf extract (green). DPPH scavenging activity (A, C, E) and ABTS<sup>+</sup> radical scavenging capacity (B, D, F).

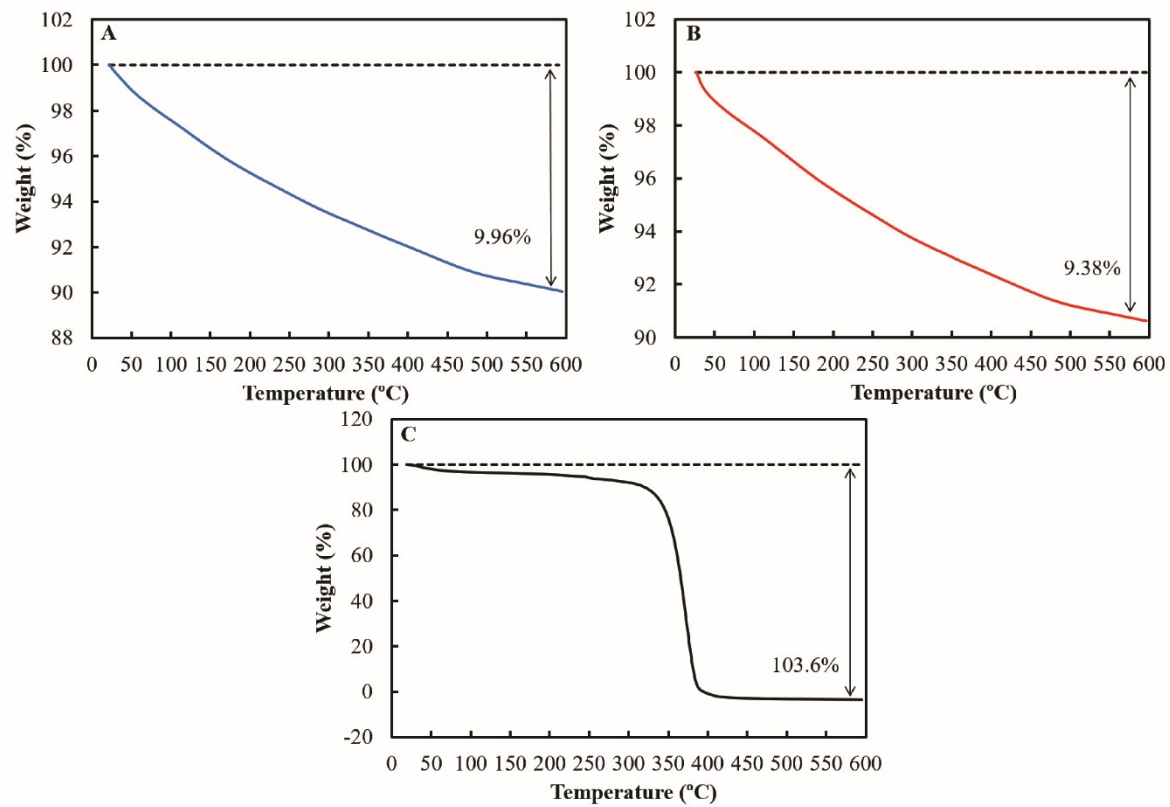

**Fig. S3** TGA spectra of Rh2-conjugated ZnONcs and ginsenoside Rh2. Rh2-HA-ZnONcs (A), Rh2-CMC-ZnONcs (B), ginsenoside Rh2 (C).

**Table S1** Absorbance of 200  $\mu\text{g/mL}$  of ZnONcs suspension and commercial sunscreen.

| <b>Wavelength<br/>(nm)</b> | <b>EE <math>\times</math> I</b> | <b>HA-<br/>ZnONcs</b> | <b>CMC-<br/>ZnONcs</b> | <b>Rh2-HA-<br/>ZnONcs</b> | <b>Rh2-CMC-<br/>ZnONcs</b> | <b>Commercial<br/>sunscreen</b> |
|----------------------------|---------------------------------|-----------------------|------------------------|---------------------------|----------------------------|---------------------------------|
| 290                        | 0.02                            | $1.14 \pm 0.01$       | $1.12 \pm 0.01$        | $1.37 \pm 0.01$           | $1.31 \pm 0.01$            | $1.79 \pm 0.18$                 |
| 295                        | 0.08                            | $1.15 \pm 0.01$       | $1.12 \pm 0.01$        | $1.38 \pm 0.01$           | $1.32 \pm 0.01$            | $1.70 \pm 0.08$                 |
| 300                        | 0.29                            | $1.16 \pm 0.01$       | $1.13 \pm 0.01$        | $1.38 \pm 0.01$           | $1.33 \pm 0.01$            | $1.69 \pm 0.06$                 |
| 305                        | 0.33                            | $1.17 \pm 0.01$       | $1.13 \pm 0.01$        | $1.39 \pm 0.02$           | $1.330 \pm 0.004$          | $1.65 \pm 0.05$                 |
| 310                        | 0.19                            | $1.17 \pm 0.01$       | $1.14 \pm 0.01$        | $1.40 \pm 0.01$           | $1.34 \pm 0.01$            | $1.66 \pm 0.05$                 |
| 315                        | 0.08                            | $1.18 \pm 0.01$       | $1.15 \pm 0.01$        | $1.40 \pm 0.02$           | $1.35 \pm 0.01$            | $1.66 \pm 0.04$                 |
| 320                        | 0.02                            | $1.18 \pm 0.01$       | $1.15 \pm 0.02$        | $1.40 \pm 0.02$           | $1.360 \pm 0.004$          | $1.67 \pm 0.02$                 |
